# Supplementary material
Source: Royal Society of Chemistry journal article supplement (doi:10.1039/d6cc01327a)
Supplement: d6cc01327a1.pdf [file d6cc01327a1.pdf]

# Supporting Information

## Synthesis and Characterization of Mixed Carbonate and Bicarbonate Materials as Candidates for Deep-UV Applications

Muhammad Mujahid Iqbal,<sup>ab</sup> Hussin Elkik,<sup>ab</sup> Changyou Liu,<sup>a</sup> Aqsa Munawar,<sup>ab</sup> Zilong Chen,<sup>ab</sup> Zhihua Yang,<sup>ab</sup> Fangfang Zhang,<sup>\*ab</sup> and Shilie Pan<sup>\*ab</sup>

<sup>a</sup> Research Center for Crystal Materials; CAS Key Laboratory of Functional Materials and Devices for Special Environmental Conditions; Xinjiang Key Laboratory of Functional Crystal Materials; Xinjiang Technical Institute of Physics and Chemistry, Chinese Academy of Sciences, 40-1 South Beijing Road, Urumqi 830011, China

<sup>b</sup> Center of Materials Science and Optoelectronics Engineering, University of Chinese Academy of Sciences, Beijing 100049, China

\*Corresponding authors (emails: ffzhang@ms.xjb.ac.cn; slpan@ms.xjb.ac.cn)

**Table S1.** Crystal data and structure refinement information of **I**, **II**, and **III**.

**Table S2.** Fractional Atomic coordinates ( $\times 10^4$ ), equivalent isotropic displacement parameters ( $\text{\AA}^2 \times 10^3$ ), and bond valence sum (BVS) calculations for **I**, **II**, and **III**.  $U(\text{eq})$  is defined as one-third of the trace of the orthogonalized  $U_{ij}$  tensor.

**Table S3.** Anisotropic displacement parameters ( $\text{\AA}^2 \times 10^3$ ) for **I**, **II**, and **III**.

**Table S4.** Selected bond lengths for **I**, **II**, and **III**.

**Table S5.** Hydrogen atom coordinates ( $\text{\AA} \times 10^4$ ) and isotropic displacement parameters ( $\text{\AA}^2 \times 10^3$ ) for **I**, **II** and **III**.

**Table S6.** Hydrogen bonds for **I**, **II**, and **III**.

**Figure S1.** Crystal structure of **II**.

**Figure S2.** K/Rb—O layers of **I** and **II**.

**Figure S3.** Coordination environment of K—O atoms in **III**.

**Figure S4.** EDS analysis of **I**, **II**, and **III**.

**Figure S5.** Birefringence measurement of **I**, **II**, and **III**.

**Figure S6.** Oscilloscope traces of the SHG signals for **I** and **II**.

**Figure S7.** The calculated phase matching wavelength ( $\lambda_{\text{PM}}$ ) for **I** and **II**.

**Figure S8.** Total and partial density of states (DOS) of **I**, **II**, and **III**.

## Experimental Section

### Single-crystal Preparation and Polycrystalline Synthesis:

The single crystals of target compounds were obtained using a room-temperature solution evaporation technique. For  $\text{NaK}_3\text{Rb}_2[(\text{CO}_3)(\text{HCO}_3)]_2 \cdot 2\text{H}_2\text{O}$  (**I**), the starting materials  $\text{NaHCO}_3$ ,  $\text{KHCO}_3$ , and  $\text{Rb}_2\text{CO}_3$  were weighed in the ratio 1:1:1; for  $\text{NaK}_{3.6}\text{Rb}_{1.4}[(\text{CO}_3)(\text{HCO}_3)]_2 \cdot 2\text{H}_2\text{O}$  (**II**), the starting materials  $\text{Na}_2\text{CO}_3$ ,  $\text{KHCO}_3$  and  $\text{Rb}_2\text{CO}_3$  were weighed in stoichiometric ratios; and for centrosymmetric compound  $\text{NaK}_5[(\text{CO}_3)(\text{HCO}_3)]_2$  (**III**), the starting materials  $\text{NaHCO}_3$  and  $\text{K}_2\text{CO}_3$  were weighed in the ratio of 1:1. All the reagents were obtained from Aladdin Chemistry, Aladdin Chemical Industry Co., Ltd., and used without further purification. The reagents for these compounds with 25 mL of distilled water were loaded in clean beakers and stirred with a magnetic stirrer until the solution turned clear. The clear solution was filtered to eliminate any contaminants. It was then covered with parafilm, with small holes to control the evaporation rate at room temperature. Within a few weeks, high-quality crystals were extracted from the solution. The polycrystalline sample for the titled compounds was obtained by grinding the obtained crystals.

### Powder X-ray Diffraction (PXRD):

PXRD data for the target compounds were acquired on a Bruker D2 PHASER diffractometer utilizing monochromatic  $\text{Cu K}\alpha$  radiation ( $\lambda = 1.5418 \text{ \AA}$ ) at room temperature, with  $2\theta$  scanning from  $5$  to  $70^\circ$  at a consistent counting period of 1 second for each step.

### Structure Determination:

A single-crystal X-ray diffractometer, Bruker D8 Venture, was used to collect the crystal data of the target compounds. The instrument employs  $\text{Mo-K}\alpha$  radiation with a wavelength of  $0.71073 \text{ \AA}$  and run at room temperature ( $25^\circ\text{C}$ ). The SHELXT program was used to solve the crystal structures, followed by refinement with the SHELXTL crystallographic software package.<sup>1,2</sup> To ensure accuracy, the crystal structures were further evaluated using the PLATON program and the online CheckCIF tool (<http://checkcif.iucr.org>).<sup>3</sup>

### Infrared (IR) Spectroscopy:

The IR spectra were performed on a Shimadzu IR Affinity-1 Fourier transform IR spectrometer within the  $400\text{--}4000 \text{ cm}^{-1}$  range. The samples were prepared by mixing it with KBr in a mass ratio of 1 (polycrystalline powder samples) to 100 (KBr).

### **UV–vis–NIR Transmittance Spectroscopy:**

The UV-Vis-NIR transmittance spectra was recorded at room temperature on a Shimadzu SolidSpec-3700DUV spectrophotometer, covering the wavelength range of 180–2600 nm.

### **Thermal Analysis:**

A NETZSCH STA 449C simultaneous thermal analyzer was used to analyze the thermal stability of the target compounds by thermal gravimetric (TG) and differential scanning calorimetry (DSC) investigations. The powder sample underwent heating in a platinum crucible at an average rate of 5 °C·min<sup>-1</sup> between 40 to 600 °C in a flowing nitrogen atmosphere.

### **Thermal Analysis:**

Elemental analyses were conducted using EDS spectroscopy coupled to a JEOL JSM-7610F Plus FE-SEM, with measurements performed at an accelerating voltage of 5 kV.

### **SHG Measurements:**

The SHG measurements for NCS compounds were performed on a modified Kurtz-Perry system,<sup>4</sup> with Q-switched Nd: YVO<sub>4</sub> laser operating at 1064 nm. To measure SHG efficiency, both materials were ground and sieved into certain particle size ranges (38-55, 55-88, 88-105, 105-150, 150-200, and 200-250 μm with KH<sub>2</sub>PO<sub>4</sub> (KDP) as a reference.

### **Birefringence Calculation:**

The birefringence of the titled compounds was assessed experimentally using a cross-polarizing microscope (ZEISS Axio Scope.5) fitted with a Berek compensator, at an average wavelength of 546.1 nm. The proper single crystals of the titled compounds, demonstrating high optical quality, were chosen for the analysis. The theoretical basis for this measurement can be represented by the following formula:

$$R = |N_g - N_p| \times T = \Delta n \times T \quad (1)$$

Where R, N<sub>g</sub>, N<sub>p</sub>, T, and Δn refer to the optical path difference, fast light refractive index, slow light refractive index, crystal thickness, and birefringence, respectively.

### **Theoretical Calculations:**

Theoretical calculations were carried out in the CASTEP program which is based on the density functional theory (DFT).<sup>5,6</sup> The electronic structures and densities of states (DOS) of the

reported compounds were computed, and the microscopic mechanism of linear properties was analyzed. Utilizing the generalized gradient approximation (GGA),<sup>7</sup> the Perdew-Burke-Ernzerhof (PBE) functional was used to characterize the exchange-correlation energy, with an energy cutoff for the plane wave selected as 750 eV for **I** and **II** and 745 eV for **III**. The k-points of Monkhorst-Pack grids in the numerical integration of the Brillouin zone,<sup>8</sup> had been configured as  $4 \times 1 \times 4$  for **I** and **II** and  $2 \times 7 \times 3$  for **III**. Adopting the norm-conserving pseudopotential (NCP),<sup>9,10</sup> the following orbital electrons were assigned as valence electrons: H:  $1s^1$ , C:  $2s^2 2p^2$ , O:  $2s^2 2p^4$ , Na:  $2s^2 2p^6 3s^1$ , K:  $3s^2 3p^6 4s^1$ , and Rb:  $4s^2 4p^6 5s^1$ .

**Table S1.** Crystal data and structure refinement information of **I**, **II**, and **III**

| Empirical formula                      | NaK <sub>3</sub> Rb <sub>2</sub> [(CO <sub>3</sub> )(HCO <sub>3</sub> )] <sub>2</sub> ·2H <sub>2</sub> O | NaK <sub>3.6</sub> Rb <sub>1.4</sub> [(CO <sub>3</sub> )(HCO <sub>3</sub> )] <sub>2</sub> ·2H <sub>2</sub> O | NaK <sub>5</sub> [(CO <sub>3</sub> )(HCO <sub>3</sub> )] <sub>2</sub>        |
|----------------------------------------|----------------------------------------------------------------------------------------------------------|--------------------------------------------------------------------------------------------------------------|------------------------------------------------------------------------------|
| Formula weight                         | 589.32                                                                                                   | 561.50                                                                                                       | 460.55                                                                       |
| Temperature/K                          | 298.0                                                                                                    | 298.0                                                                                                        | 298.0                                                                        |
| Crystal system                         | orthorhombic                                                                                             | orthorhombic                                                                                                 | monoclinic                                                                   |
| Space group                            | <i>P</i> 2 <sub>1</sub> 2 <sub>1</sub> 2                                                                 | <i>P</i> 2 <sub>1</sub> 2 <sub>1</sub> 2                                                                     | <i>C</i> 2/ <i>c</i>                                                         |
| <i>a</i> / Å                           | 7.0676(11)                                                                                               | 7.0440(5)                                                                                                    | 16.707(2)                                                                    |
| <i>b</i> / Å                           | 19.320(3)                                                                                                | 19.2638(14)                                                                                                  | 5.6033(6)                                                                    |
| <i>c</i> / Å                           | 5.5570(9)                                                                                                | 5.5612(3)                                                                                                    | 13.8756(19)                                                                  |
| <i>α</i> / °                           | 90                                                                                                       | 90                                                                                                           | 90                                                                           |
| <i>β</i> / °                           | 90                                                                                                       | 90                                                                                                           | 103.955(5)                                                                   |
| <i>γ</i> / °                           | 90                                                                                                       | 90                                                                                                           | 90                                                                           |
| Volume / Å <sup>3</sup>                | 758.8(2)                                                                                                 | 754.62(9)                                                                                                    | 1260.6(3)                                                                    |
| <i>Z</i>                               | 2                                                                                                        | 2                                                                                                            | 4                                                                            |
| $\rho_{calc}/g\cdot cm^{-3}$           | 2.579                                                                                                    | 2.471                                                                                                        | 2.427                                                                        |
| $\mu/mm^{-1}$                          | 7.372                                                                                                    | 5.656                                                                                                        | 1.841                                                                        |
| <i>F</i> (000)                         | 568.0                                                                                                    | 546.0                                                                                                        | 916.937                                                                      |
| Radiation                              | Mo-K $\alpha$ ( $\lambda$ = 0.71073)                                                                     | Mo-K $\alpha$ ( $\lambda$ = 0.71073)                                                                         | Mo-K $\alpha$ ( $\lambda$ = 0.71073)                                         |
| Completeness/%                         | 99.6                                                                                                     | 98.0                                                                                                         | 99.2                                                                         |
| 2 $\theta$ range for data collection/° | 4.216 to 55.046                                                                                          | 6.158 to 54.88                                                                                               | 5.024 to 55.046                                                              |
| Index ranges                           | -9 ≤ <i>h</i> ≤ 9, -25 ≤ <i>k</i> ≤ 24, -7 ≤ <i>l</i> ≤ 7                                                | -9 ≤ <i>h</i> ≤ 9, -23 ≤ <i>k</i> ≤ 25, -7 ≤ <i>l</i> ≤ 7                                                    | -21 ≤ <i>h</i> ≤ 21, -6 ≤ <i>k</i> ≤ 7, -18 ≤ <i>l</i> ≤ 17                  |
| Reflections collected                  | 16749                                                                                                    | 5519                                                                                                         | 10842                                                                        |
| Independent reflections                | 1736 [ <i>R</i> <sub>int</sub> = 0.0514, <i>R</i> <sub>sigma</sub> = 0.0318]                             | 1695 [ <i>R</i> <sub>int</sub> = 0.0512, <i>R</i> <sub>sigma</sub> = 0.0571]                                 | 1433 [ <i>R</i> <sub>int</sub> = 0.0382, <i>R</i> <sub>sigma</sub> = 0.0228] |
| Data/restraints/parameters             | 1736/0/111                                                                                               | 1695/4/124                                                                                                   | 1433/0/107                                                                   |

|                                                             |                               |                               |                                    |
|-------------------------------------------------------------|-------------------------------|-------------------------------|------------------------------------|
| Goodness-of-fit<br>on $F^2$                                 | 1.135                         | 0.858                         | 1.051                              |
| Final $R$ indexes [ $I$<br>$\geq 2\sigma(I)$ ] <sup>a</sup> | $R_1 = 0.0220, wR_2 = 0.0561$ | $R_1 = 0.0236, wR_2 = 0.0522$ | $R_1 = 0.0184, wR_2 =$<br>$0.0484$ |
| Final $R$ indexes<br>[all data] <sup>a</sup>                | $R_1 = 0.0231, wR_2 = 0.0565$ | $R_1 = 0.0265, wR_2 = 0.0533$ | $R_1 = 0.0262, wR_2 =$<br>$0.0507$ |
| Largest diff.<br>peak/hole / e Å <sup>-3</sup>              | 0.42/-0.64                    | 0.25/-0.21                    | 0.29/-0.26                         |
| Flack parameter                                             | 0.015(13)                     | 0.120(10)                     | NA                                 |

$$^a R_1 = \frac{\sum ||F_o| - |F_c||}{\sum |F_o|} \text{ and } wR_2 = [\frac{\sum w(F_o^2 - F_c^2)^2}{\sum wF_o^4}]^{1/2} \text{ for } F_o^2 > 2\sigma$$

**Table S2.** Fractional Atomic coordinates ( $\times 10^4$ ), equivalent isotropic displacement parameters ( $\text{\AA}^2 \times 10^3$ ), and bond valence sum (BVS) calculations for **I, II, and III**.  $U(\text{eq})$  is defined as one-third of the trace of the orthogonalized  $U_{ij}$  tensor.

| <b>I- NaK<sub>3</sub>Rb<sub>2</sub>[(CO<sub>3</sub>)(HCO<sub>3</sub>)<sub>2</sub>·2H<sub>2</sub>O</b>      |          |          |          |                       |            |
|------------------------------------------------------------------------------------------------------------|----------|----------|----------|-----------------------|------------|
| <b>Atom</b>                                                                                                | <b>x</b> | <b>y</b> | <b>z</b> | <b>U<sub>eq</sub></b> | <b>BVS</b> |
| K(1)/Rb(1)                                                                                                 | 5000     | 5000     | 9127(2)  | 24(1)                 | 1.09       |
| K(2)/Rb(2)                                                                                                 | 1528(1)  | 5904(1)  | 4388(2)  | 28(1)                 | 1.35       |
| K(3)/Rb(3)                                                                                                 | 8154(1)  | 6841(1)  | -975(1)  | 26(1)                 | 1.10       |
| Na(1)                                                                                                      | 0        | 5000     | -666(4)  | 22(1)                 | 1.23       |
| C(1)                                                                                                       | 2805(5)  | 4338(2)  | 4212(8)  | 20(1)                 | 4.07       |
| C(2)                                                                                                       | 2901(5)  | 6502(2)  | -658(7)  | 20(1)                 | 4.03       |
| O(1)                                                                                                       | 2057(4)  | 4518(2)  | 6177(5)  | 26(1)                 | 2.13       |
| O(2)                                                                                                       | 4474(5)  | 4025(2)  | 4379(7)  | 44(1)                 | 1.89       |
| O(3)                                                                                                       | 2091(4)  | 4430(2)  | 2189(5)  | 26(1)                 | 2.11       |
| O(4)                                                                                                       | 4321(4)  | 6622(2)  | 742(6)   | 32(1)                 | 1.69       |
| O(5)                                                                                                       | 1995(4)  | 5935(1)  | -507(6)  | 30(1)                 | 2.21       |
| O(6)                                                                                                       | 2418(4)  | 6967(2)  | -2177(6) | 28(1)                 | 1.75       |
| O(7)                                                                                                       | 5115(6)  | 7788(2)  | -3864(7) | 52(1)                 | 1.37       |
| <b>II- NaK<sub>3.6</sub>Rb<sub>1.4</sub>[(CO<sub>3</sub>)(HCO<sub>3</sub>)<sub>2</sub>·2H<sub>2</sub>O</b> |          |          |          |                       |            |
| <b>Atom</b>                                                                                                | <b>x</b> | <b>y</b> | <b>z</b> | <b>U<sub>eq</sub></b> | <b>BVS</b> |
| K(1)/Rb(1)                                                                                                 | 5000     | 5000     | 14169(2) | 26(1)                 | 1.10       |
| K(2)/Rb(2)                                                                                                 | 3155(1)  | 1838(1)  | 5956(1)  | 28(1)                 | 0.89       |
| K(3)                                                                                                       | 6529(1)  | 904(1)   | 569(2)   | 25(1)                 | 1.18       |
| Na(1)                                                                                                      | 0        | 5000     | 4377(4)  | 23(1)                 | 1.23       |
| C(1)                                                                                                       | 2812(5)  | 5667(2)  | 9255(7)  | 21(1)                 | 4.13       |
| C(2)                                                                                                       | 2900(5)  | 3492(2)  | 4384(6)  | 20(1)                 | 4.16       |
| O(1)                                                                                                       | 4497(4)  | 5979(2)  | 9395(6)  | 47(1)                 | 1.66       |
| O(2)                                                                                                       | 2059(4)  | 5490(1)  | 11218(5) | 28(1)                 | 1.85       |
| O(3)                                                                                                       | 2086(4)  | 5573(2)  | 7218(5)  | 27(1)                 | 1.71       |
| O(4)                                                                                                       | 4341(4)  | 3372(1)  | 5763(6)  | 35(1)                 | 1.56       |

|      |         |         |         |       |      |
|------|---------|---------|---------|-------|------|
| O(5) | 2003(4) | 4061(1) | 4547(5) | 32(1) | 2.02 |
| O(6) | 2399(4) | 3030(1) | 2876(5) | 30(1) | 1.70 |
| O(7) | 5084(6) | 2204(2) | 1103(7) | 59(1) | 1.36 |

| III-NaK <sub>5</sub> [(CO <sub>3</sub> )(HCO <sub>3</sub> ) <sub>2</sub> ] |         |          |         |                 |      |
|----------------------------------------------------------------------------|---------|----------|---------|-----------------|------|
| Atom                                                                       | x       | y        | z       | U <sub>eq</sub> | BVS  |
| K(1)                                                                       | 6069(1) | 277(1)   | 7073(1) | 20(1)           | 0.98 |
| K(2)                                                                       | 5000    | 5000     | 0       | 26(1)           | 1.00 |
| K(3)                                                                       | 8006(1) | 9767(1)  | 1087(1) | 24(1)           | 1.04 |
| Na(1)                                                                      | 5000    | 4736(1)  | 2500    | 20(1)           | 1.18 |
| C(1)                                                                       | 5786(1) | -160(2)  | 4177(1) | 16(1)           | 4.11 |
| C(2)                                                                       | 6811(1) | 4947(2)  | 1561(1) | 15(1)           | 4.16 |
| O(1)                                                                       | 6140(1) | -149(2)  | 5124(1) | 30(1)           | 1.87 |
| O(2)                                                                       | 5627(1) | -2157(2) | 3728(1) | 21(1)           | 1.96 |
| O(3)                                                                       | 5610(1) | 1817(2)  | 3733(1) | 22(1)           | 1.96 |
| O(4)                                                                       | 6135(1) | 4593(2)  | 1802(1) | 20(1)           | 2.05 |
| O(5)                                                                       | 6945(1) | 3774(2)  | 782(1)  | 25(1)           | 1.49 |
| O(6)                                                                       | 7350(1) | 6371(2)  | 1994(1) | 24(1)           | 2.00 |

**Table S3.** Anisotropic displacement parameters ( $\text{\AA}^2 \times 10^3$ ) for **I, II, and III.**

| <b>I- NaK<sub>3</sub>Rb<sub>2</sub>[(CO<sub>3</sub>)(HCO<sub>3</sub>)<sub>2</sub>·2H<sub>2</sub>O</b> |                       |                       |                       |                       |                       |                       |
|-------------------------------------------------------------------------------------------------------|-----------------------|-----------------------|-----------------------|-----------------------|-----------------------|-----------------------|
| <b>Atom</b>                                                                                           | <b>U<sub>11</sub></b> | <b>U<sub>22</sub></b> | <b>U<sub>33</sub></b> | <b>U<sub>23</sub></b> | <b>U<sub>13</sub></b> | <b>U<sub>12</sub></b> |
| K(1)/Rb(1)                                                                                            | 16(1)                 | 29(1)                 | 26(1)                 | 0                     | 0                     | -1(1)                 |
| K(2)/Rb(2)                                                                                            | 27(1)                 | 33(1)                 | 26(1)                 | 1(1)                  | 1(1)                  | 1(1)                  |
| K(3)/Rb(3)                                                                                            | 26(1)                 | 22(1)                 | 30(1)                 | -2(1)                 | 5(1)                  | 0(1)                  |
| Na(1)                                                                                                 | 23(1)                 | 20(1)                 | 24(1)                 | 0                     | 0                     | -4(1)                 |
| C(1)                                                                                                  | 19(2)                 | 18(2)                 | 24(2)                 | -1(2)                 | 0(2)                  | -1(1)                 |
| C(2)                                                                                                  | 18(2)                 | 20(2)                 | 23(2)                 | -1(2)                 | 4(2)                  | 2(1)                  |
| O(1)                                                                                                  | 27(1)                 | 31(1)                 | 19(1)                 | -5(1)                 | 2(1)                  | 3(1)                  |
| O(2)                                                                                                  | 28(2)                 | 72(2)                 | 33(2)                 | -16(2)                | -10(1)                | 26(2)                 |
| O(3)                                                                                                  | 26(2)                 | 33(2)                 | 20(1)                 | 3(1)                  | -2(1)                 | 4(1)                  |
| O(4)                                                                                                  | 25(1)                 | 32(2)                 | 38(2)                 | 8(2)                  | -10(1)                | -4(1)                 |
| O(5)                                                                                                  | 35(2)                 | 21(1)                 | 32(2)                 | -1(1)                 | 6(1)                  | -10(1)                |
| O(6)                                                                                                  | 28(1)                 | 25(2)                 | 31(2)                 | 7(1)                  | -6(1)                 | -1(1)                 |
| O(7)                                                                                                  | 68(2)                 | 41(2)                 | 47(2)                 | 0(2)                  | 27(2)                 | -20(2)                |

  

| <b>II- NaK<sub>3.6</sub>Rb<sub>1.4</sub>[(CO<sub>3</sub>)(HCO<sub>3</sub>)<sub>2</sub>·2H<sub>2</sub>O</b> |                       |                       |                       |                       |                       |                       |
|------------------------------------------------------------------------------------------------------------|-----------------------|-----------------------|-----------------------|-----------------------|-----------------------|-----------------------|
| <b>Atom</b>                                                                                                | <b>U<sub>11</sub></b> | <b>U<sub>22</sub></b> | <b>U<sub>33</sub></b> | <b>U<sub>23</sub></b> | <b>U<sub>13</sub></b> | <b>U<sub>12</sub></b> |
| K(1)/Rb(1)                                                                                                 | 17(1)                 | 33(1)                 | 28(1)                 | 0                     | 0                     | 1(1)                  |
| K(2)/Rb(2)                                                                                                 | 28(1)                 | 24(1)                 | 33(1)                 | 2(1)                  | -6(1)                 | 0(1)                  |
| K(3)                                                                                                       | 22(1)                 | 30(1)                 | 23(1)                 | -1(1)                 | -1(1)                 | 1(1)                  |
| Na(1)                                                                                                      | 21(1)                 | 23(1)                 | 26(1)                 | 0                     | 0                     | 3(1)                  |
| C(1)                                                                                                       | 19(2)                 | 21(2)                 | 22(2)                 | -1(2)                 | 0(2)                  | 1(1)                  |
| C(2)                                                                                                       | 18(2)                 | 21(2)                 | 22(2)                 | 2(1)                  | 3(1)                  | -1(1)                 |
| O(1)                                                                                                       | 29(2)                 | 78(2)                 | 33(2)                 | 16(2)                 | -10(1)                | -26(2)                |
| O(2)                                                                                                       | 28(1)                 | 33(1)                 | 23(1)                 | 7(1)                  | 3(1)                  | -2(1)                 |
| O(3)                                                                                                       | 25(2)                 | 37(2)                 | 20(1)                 | -3(1)                 | -1(1)                 | -5(1)                 |
| O(4)                                                                                                       | 27(1)                 | 37(2)                 | 41(2)                 | -8(1)                 | -9(1)                 | 4(1)                  |
| O(5)                                                                                                       | 40(2)                 | 24(1)                 | 32(2)                 | 1(1)                  | 7(1)                  | 12(1)                 |
| O(6)                                                                                                       | 32(1)                 | 25(2)                 | 33(1)                 | -6(1)                 | -6(1)                 | 1(1)                  |

|                                                                            | O(7)                  | 76(3)                 | 48(2)                 | 52(2)                 | 6(2)                  | 31(2)                 | 21(2) |
|----------------------------------------------------------------------------|-----------------------|-----------------------|-----------------------|-----------------------|-----------------------|-----------------------|-------|
| <b>III- NaK<sub>5</sub>[(CO<sub>3</sub>)(HCO<sub>3</sub>)<sub>2</sub>]</b> |                       |                       |                       |                       |                       |                       |       |
| <b>Atom</b>                                                                | <b>U<sub>11</sub></b> | <b>U<sub>22</sub></b> | <b>U<sub>33</sub></b> | <b>U<sub>23</sub></b> | <b>U<sub>13</sub></b> | <b>U<sub>12</sub></b> |       |
| K(1)                                                                       | 21(1)                 | 18(1)                 | 20(1)                 | -1(1)                 | 7(1)                  | 0(1)                  |       |
| K(2)                                                                       | 25(1)                 | 36(1)                 | 17(1)                 | 0(1)                  | 4(1)                  | 10(1)                 |       |
| K(3)                                                                       | 20(1)                 | 28(1)                 | 25(1)                 | 7(1)                  | 6(1)                  | 1(1)                  |       |
| Na(1)                                                                      | 17(1)                 | 22(1)                 | 22(1)                 | 0                     | 6(1)                  | 0                     |       |
| C(1)                                                                       | 13(1)                 | 18(1)                 | 18(1)                 | 0(1)                  | 6(1)                  | 0(1)                  |       |
| C(2)                                                                       | 16(1)                 | 14(1)                 | 15(1)                 | 4(1)                  | 3(1)                  | 3(1)                  |       |
| O(1)                                                                       | 44(1)                 | 27(1)                 | 16(1)                 | -1(1)                 | 0(1)                  | 2(1)                  |       |
| O(2)                                                                       | 24(1)                 | 17(1)                 | 21(1)                 | -2(1)                 | 4(1)                  | -2(1)                 |       |
| O(3)                                                                       | 25(1)                 | 17(1)                 | 25(1)                 | 4(1)                  | 6(1)                  | 3(1)                  |       |
| O(4)                                                                       | 15(1)                 | 23(1)                 | 22(1)                 | 1(1)                  | 6(1)                  | 0(1)                  |       |
| O(5)                                                                       | 27(1)                 | 30(1)                 | 20(1)                 | -5(1)                 | 9(1)                  | 0(1)                  |       |
| O(6)                                                                       | 19(1)                 | 21(1)                 | 28(1)                 | -1(1)                 | 1(1)                  | -5(1)                 |       |

**The Anisotropic displacement factor exponent takes the form:**

$$-2\pi^2[h^2a^2U_{11}+2hka*b*U_{12}+...].$$

**Table S4.** Selected bond lengths for **I, II, and III.**

| <b>I- NaK<sub>3</sub>Rb<sub>2</sub>[(CO<sub>3</sub>)(HCO<sub>3</sub>)<sub>2</sub>·2H<sub>2</sub>O</b> |          |                               |          |
|-------------------------------------------------------------------------------------------------------|----------|-------------------------------|----------|
| K(1)/Rb(1)-O(1)                                                                                       | 2.808(3) | K(3)Rb(3)-O(3) <sup>#7</sup>  | 3.026(3) |
| K(1)/Rb(1)-O(1) <sup>#7</sup>                                                                         | 2.808(3) | K(3)Rb(3)-O(4) <sup>#10</sup> | 3.084(3) |
| K(1)/Rb(1)-O(2)                                                                                       | 3.263(4) | K(3)Rb(3)-O(4)                | 2.903(3) |
| K(1)/Rb(1)-O(2) <sup>#7</sup>                                                                         | 3.263(4) | K(3)Rb(3)-O(5) <sup>#9</sup>  | 3.241(3) |
| K(1)/Rb(1)-O(3) <sup>#6</sup>                                                                         | 2.887(3) | K(3)Rb(3)-O(6) <sup>#10</sup> | 2.940(3) |
| K(1)/Rb(1)-O(3) <sup>#5</sup>                                                                         | 2.887(3) | K(3)Rb(3)-O(6) <sup>#9</sup>  | 3.096(3) |
| K(1)/Rb(1)-O(4) <sup>#5</sup>                                                                         | 3.295(3) | K(3)Rb(3)-O(7) <sup>#12</sup> | 3.265(4) |
| K(1)/Rb(1)-O(4) <sup>#6</sup>                                                                         | 3.295(3) | K(3)Rb(3)-O(7)                | 3.246(5) |
| K(1)/Rb(1)-O(5) <sup>#5</sup>                                                                         | 2.796(3) | K(3)Rb(3)-O(7) <sup>#10</sup> | 3.109(4) |
| K(1)/Rb(1)-O(5) <sup>#6</sup>                                                                         | 2.796(3) | Na(1)-O(1) <sup>#4</sup>      | 2.462(3) |
| K(2)/Rb(2)-O(1) <sup>#3</sup>                                                                         | 2.841(3) | Na(1)-O(1) <sup>#2</sup>      | 2.462(3) |
| K(2)/Rb(2)-O(1)                                                                                       | 2.881(3) | Na(1)-O(3) <sup>#3</sup>      | 2.431(3) |
| K(2)/Rb(2)-O(2) <sup>#7</sup>                                                                         | 2.829(3) | Na(1)-O(3)                    | 2.431(3) |
| K(2)/Rb(2)-O(3) <sup>#3</sup>                                                                         | 2.907(3) | Na(1)-O(5) <sup>#3</sup>      | 2.294(3) |
| K(2)/Rb(2)-O(3)                                                                                       | 3.123(3) | Na(1)-O(5)                    | 2.294(3) |
| K(2)/Rb(2)-O(4)                                                                                       | 3.151(3) | C(1)-O(1)                     | 1.262(5) |
| K(2)/Rb(2)-O(5)                                                                                       | 2.741(3) | C(1)-O(2)                     | 1.329(5) |
| K(2)/Rb(2)-O(5) <sup>#6</sup>                                                                         | 2.857(3) | C(1)-O(3)                     | 1.245(5) |
| K(2)/Rb(2)-O(6) <sup>#6</sup>                                                                         | 2.874(3) | C(2)-O(4)                     | 1.291(5) |
| K(2)/Rb(2)-O(7) <sup>#8</sup>                                                                         | 2.733(3) | C(2)-O(5)                     | 1.271(4) |
| K(3)/Rb(3)-O(1) <sup>#11</sup>                                                                        | 3.069(3) | C(2)-O(6)                     | 1.279(5) |

Symmetry transformations used to generate equivalent atoms:

<sup>#1</sup> x-1,y,z-1   <sup>#2</sup> x,y,z-1   <sup>#3</sup> -x,-y+1,z   <sup>#4</sup> -x,-y+1,z-1

<sup>#5</sup> -x+1,-y+1,z+1   <sup>#6</sup> x,y,z+1   <sup>#7</sup> -x+1,-y+1,z

<sup>#8</sup> x-1/2,-y+3/2,-z   <sup>#9</sup> x+1,y,z   <sup>#10</sup> x+1/2,-y+3/2,-z

<sup>#11</sup> -x+1,-y+1,z-1   <sup>#12</sup> x+1/2,-y+3/2,-z-1   <sup>#13</sup> x-1,y,z

<sup>#14</sup> x-1/2,-y+3/2,-z-1

**II- NaK<sub>3,6</sub>Rb<sub>1,4</sub>[(CO<sub>3</sub>)(HCO<sub>3</sub>)]<sub>2</sub>·2H<sub>2</sub>O**

|                         |          |                           |          |
|-------------------------|----------|---------------------------|----------|
| K(1)-O(1) <sup>#3</sup> | 3.275(4) | K(3)-O(2) <sup>#6</sup>   | 2.830(3) |
| K(1)-O(1)               | 3.275(4) | K(3)-O(2) <sup>#4</sup>   | 2.888(3) |
| K(1)-O(2) <sup>#3</sup> | 2.806(3) | K(3)-O(3) <sup>#4</sup>   | 3.126(3) |
| K(1)-O(2)               | 2.806(3) | K(3)-O(3) <sup>#6</sup>   | 2.899(3) |
| K(1)-O(3) <sup>#2</sup> | 2.882(3) | K(3)-O(5) <sup>#8</sup>   | 2.865(3) |
| K(1)-O(3) <sup>#1</sup> | 2.882(3) | K(3)-O(5) <sup>#4</sup>   | 2.737(3) |
| K(1)-O(4) <sup>#1</sup> | 3.292(3) | K(3)-O(6) <sup>#8</sup>   | 2.875(3) |
| K(1)-O(4) <sup>#2</sup> | 3.292(3) | K(3)-O(7)                 | 2.720(3) |
| K(1)-O(5) <sup>#1</sup> | 2.788(3) | Na(1)-O(2) <sup>#10</sup> | 2.466(3) |
| K(1)-O(5) <sup>#2</sup> | 2.788(3) | Na(1)-O(2) <sup>#11</sup> | 2.466(3) |
| K(2)-O(2) <sup>#5</sup> | 3.038(3) | Na(1)-O(3) <sup>#12</sup> | 2.424(3) |
| K(2)-O(3) <sup>#6</sup> | 3.013(3) | Na(1)-O(3)                | 2.424(3) |
| K(2)-O(4) <sup>#7</sup> | 2.880(3) | Na(1)-O(5)                | 2.296(2) |
| K(2)-O(4)               | 3.073(3) | Na(1)-O(5) <sup>#12</sup> | 2.296(2) |
| K(2)-O(5) <sup>#4</sup> | 3.229(3) | C(1)-O(1)                 | 1.332(4) |
| K(2)-O(6) <sup>#4</sup> | 3.070(3) | C(1)-O(2)                 | 1.261(4) |
| K(2)-O(6)               | 2.914(3) | C(1)-O(3)                 | 1.256(4) |
| K(2)-O(7) <sup>#7</sup> | 3.280(5) | C(2)-O(4)                 | 1.293(5) |
| K(2)-O(7) <sup>#2</sup> | 3.246(4) | C(2)-O(5)                 | 1.268(4) |
| K(2)-O(7)               | 3.103(4) | C(2)-O(6)                 | 1.274(4) |
| K(3)-O(1) <sup>#9</sup> | 2.804(3) |                           |          |

Symmetry transformations used to generate equivalent atoms:

#1 -x+1,-y+1,z+1   #2 x,y,z+1   #3 -x+1,-y+1,z   #4 x+1/2,-y+1/2,-z+1   #5 -x+1/2,y-1/2,-z+2   #6 -  
x+1/2,y-1/2,-z+1   #7 x-1/2,-y+1/2,-z+1   #8 x+1/2,-y+1/2,-z   #9 -x+3/2,y-1/2,-z+1  
#10 -x,-y+1,z-1   #11 x,y,z-1   #12 -x,-y+1,z

**III-NaK<sub>5</sub>[(CO<sub>3</sub>)(HCO<sub>3</sub>)<sub>2</sub>]**

|                         |            |                           |            |
|-------------------------|------------|---------------------------|------------|
| K(1)-O(1)               | 2.7449(11) | K(3)-O(2) <sup>#12</sup>  | 2.8229(9)  |
| K(1)-O(2) <sup>#2</sup> | 2.7834(9)  | K(3)-O(3) <sup>#11</sup>  | 2.8049(10) |
| K(1)-O(2) <sup>#3</sup> | 2.9770(9)  | K(3)-O(4) <sup>#11</sup>  | 2.9368(10) |
| K(1)-O(3) <sup>#2</sup> | 2.8509(10) | K(3)-O(5) <sup>#13</sup>  | 2.7383(10) |
| K(1)-O(3) <sup>#3</sup> | 2.9974(10) | K(3)-O(5) <sup>#14</sup>  | 2.8277(10) |
| K(1)-O(4) <sup>#2</sup> | 2.7604(10) | K(3)-O(6) <sup>#11</sup>  | 3.0023(10) |
| K(1)-O(6) <sup>#1</sup> | 2.8682(10) | K(3)-O(6)                 | 2.6593(10) |
| K(1)-O(6) <sup>#4</sup> | 2.8025(10) | Na(1)-O(2) <sup>#14</sup> | 2.4841(10) |
| K(2)-O(1) <sup>#6</sup> | 3.2992(11) | Na(1)-O(2) <sup>#6</sup>  | 2.4841(10) |
| K(2)-O(1) <sup>#7</sup> | 3.2992(11) | Na(1)-O(3) <sup>#9</sup>  | 2.4082(10) |
| K(2)-O(2) <sup>#7</sup> | 2.7647(9)  | Na(1)-O(3)                | 2.4082(10) |
| K(2)-O(2) <sup>#6</sup> | 2.7647(9)  | Na(1)-O(4)                | 2.3298(9)  |
| K(2)-O(3) <sup>#8</sup> | 2.8587(9)  | Na(1)-O(4) <sup>#9</sup>  | 2.3298(9)  |
| K(2)-O(3) <sup>#9</sup> | 2.8587(9)  | C(1)-O(1)                 | 1.3051(17) |
| K(2)-O(4) <sup>#5</sup> | 2.7592(9)  | C(1)-O(2)                 | 1.2769(15) |
| K(2)-O(4)               | 2.7592(9)  | C(1)-O(3)                 | 1.2671(15) |
| K(2)-O(5) <sup>#5</sup> | 3.2421(10) | C(2)-O(4)                 | 1.2676(16) |
| K(2)-O(5)               | 3.2421(10) | C(2)-O(5)                 | 1.3305(15) |
| K(3)-O(1) <sup>#8</sup> | 3.0887(12) | C(2)-O(6)                 | 1.2441(15) |

Symmetry transformations used to generate equivalent atoms:

#1 -x,y+1,-z+3/2   #2 -x,y,-z+3/2   #3 1-x,-y,1-z   #4 3/2-x,1/2-y,1-z  
 #5 1-x,1-y,-z   #6 x+1,y+1,z   #7 -x,y,-z+1/2   #8 -x,y+1,-z+1/2  
 #9 x+1,y,z   #10 3/2-x,1/2+y,1/2-z   #11 -x+1,-y,-z   #12 -x+1,-y+1,-z  
 #13 +x,1+y,+z   #14 3/2-x,3/2-y,-z

**Table S5.** Hydrogen atom coordinates ( $\text{\AA}\times 10^4$ ) and isotropic displacement parameters ( $\text{\AA}^2\times 10^3$ ) for **I**, **II**, and **III**.

| <b>I- NaK<sub>3</sub>Rb<sub>2</sub>[(CO<sub>3</sub>)(HCO<sub>3</sub>)<sub>2</sub>·2H<sub>2</sub>O]</b> |          |          |          |                       |
|--------------------------------------------------------------------------------------------------------|----------|----------|----------|-----------------------|
| <b>Atom</b>                                                                                            | <b>x</b> | <b>y</b> | <b>z</b> | <b>U<sub>eq</sub></b> |
| H(2)                                                                                                   | 5062     | 3857     | 3252     | 78                    |
| H(7A)                                                                                                  | 4254     | 7492     | -3578    | 78                    |
| H(7B)                                                                                                  | 4836     | 7950     | -5241    | 78                    |

---

| <b>II- NaK<sub>3.6</sub>Rb<sub>1.4</sub>[(CO<sub>3</sub>)(HCO<sub>3</sub>)<sub>2</sub>·2H<sub>2</sub>O]</b> |          |          |           |                       |
|-------------------------------------------------------------------------------------------------------------|----------|----------|-----------|-----------------------|
| <b>Atom</b>                                                                                                 | <b>x</b> | <b>y</b> | <b>z</b>  | <b>U<sub>eq</sub></b> |
| H(1)                                                                                                        | 4900(80) | 6190(20) | 7950(50)  | 55(16)                |
| H(7A)                                                                                                       | 5720(50) | 2360(20) | -100(50)  | 20(11)                |
| H(7B)                                                                                                       | 4250(60) | 2520(20) | 1290(100) | 80(20)                |

---

| <b>III- NaK<sub>5</sub>[(CO<sub>3</sub>)(HCO<sub>3</sub>)<sub>2</sub>]</b> |          |          |          |                       |
|----------------------------------------------------------------------------|----------|----------|----------|-----------------------|
| <b>Atom</b>                                                                | <b>x</b> | <b>y</b> | <b>z</b> | <b>U<sub>eq</sub></b> |
| H(5)                                                                       | 6583(12) | 2620(30) | 534(17)  | 110(10)               |

**Table S6.** Hydrogen bonds for **I**, **II**, and **III**.

| <b>I- NaK<sub>3</sub>Rb<sub>2</sub>[(CO<sub>3</sub>)(HCO<sub>3</sub>)<sub>2</sub>·2H<sub>2</sub>O</b> |               |                 |                 |                  |
|-------------------------------------------------------------------------------------------------------|---------------|-----------------|-----------------|------------------|
| <b>D-H...A</b>                                                                                        | <b>d(D-H)</b> | <b>d(H...A)</b> | <b>d(D...A)</b> | <b>&lt;(DHA)</b> |
| O(2)-H(2)...O(4) <sup>#1</sup>                                                                        | 0.82          | 1.73            | 2.524(5)        | 163.2            |
| O(7)-H(7A)...O(6)                                                                                     | 0.85          | 1.82            | 2.651(4)        | 164.6            |
| O(7)-H(7B)...O(6) <sup>#2</sup>                                                                       | 0.85          | 2.33            | 2.778(5)        | 113.5            |

Symmetry transformations used to generate equivalent atoms:

#1  $-x+1, -y+1, z$       #2  $x+1/2, -y+3/2, -z-1$ 

| <b>II- NaK<sub>3,6</sub>Rb<sub>1,4</sub>[(CO<sub>3</sub>)(HCO<sub>3</sub>)<sub>2</sub>·2H<sub>2</sub>O</b> |               |                 |                 |                  |
|------------------------------------------------------------------------------------------------------------|---------------|-----------------|-----------------|------------------|
| <b>D-H...A</b>                                                                                             | <b>d(D-H)</b> | <b>d(H...A)</b> | <b>d(D...A)</b> | <b>&lt;(DHA)</b> |
| O(1)-H(1)...O(4) <sup>#1</sup>                                                                             | 0.944(13)     | 1.575(16)       | 2.513(4)        | 172(5)           |
| O(7)-H(7A)...O(6) <sup>#2</sup>                                                                            | 0.857(13)     | 2.09(3)         | 2.786(4)        | 138(4)           |
| O(7)-H(7B)...O(6)                                                                                          | 0.849(13)     | 1.86(2)         | 2.661(4)        | 157(5)           |

Symmetry transformations used to generate equivalent atoms:

#1  $-x+1, -y+1, z$       #2  $x+1/2, -y+1/2, -z$ 

| <b>III- NaK<sub>5</sub>[(CO<sub>3</sub>)(HCO<sub>3</sub>)<sub>2</sub></b> |               |                 |                 |                  |
|---------------------------------------------------------------------------|---------------|-----------------|-----------------|------------------|
| <b>D-H...A</b>                                                            | <b>d(D-H)</b> | <b>d(H...A)</b> | <b>d(D...A)</b> | <b>&lt;(DHA)</b> |
| O(5)-H(5)...O(1) <sup>#1</sup>                                            | 0.896(8)      | 1.608(11)       | 2.4853(14)      | 166(3)           |

Symmetry transformations used to generate equivalent atoms:

#1  $-x, y, -z+1/2$

## Crystal structure of II

The crystal structure of II is provided in Fig. S1. In its asymmetric unit, there is one Na atom, three K atoms, two Rb atoms, two C atoms, and seven O atoms. The Na atom is coordinated with six O atoms, forming a  $\text{NaO}_6$  polyhedron (Fig. S1a). The K and Rb occupied atoms are coordinated with O atoms to form the  $\text{K(1)/Rb(1)O}_6$  and  $\text{K(2)/Rb(2)O}_9$  polyhedra (Fig. S1a), and K(3) atom is coordinated with O atoms to form a  $\text{KO}_{10}$  polyhedron. The K/Rb—O layers viewed along the *c*-axis are shown in Fig. S2b. The unit cell arrangement of fundamental building blocks  $[\text{CO}_3]^{2-}$  and  $[\text{HCO}_3]^-$  groups is presented in Fig. S1b. The O atoms from two sources  $[\text{CO}_3]^{2-}$  and  $[\text{HCO}_3]^-$  connect  $\text{NaO}_6$ ,  $\text{KO}_{10}$ , and  $\text{K/RbO}_{10}$  to form the overall structure of II as shown in Fig. S1c. The BVS of the possible atoms is in a reasonable range and is shown in Table S2.

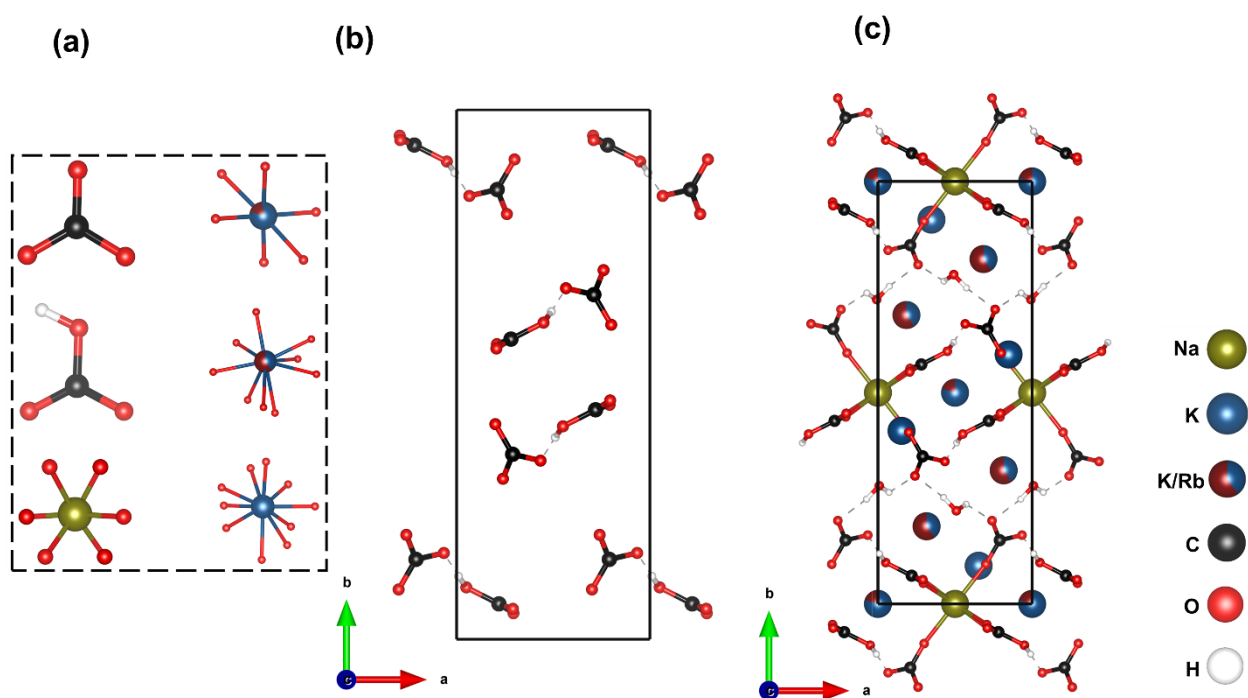

**Fig. S1** Crystal structure of II. (a)  $[(\text{CO}_3) (\text{HCO}_3)]$  FBBs,  $\text{NaO}_6$ ,  $\text{K(1)/Rb(1)O}_6$ ,  $\text{K(2)/Rb(2)O}_9$ ,  $\text{K(3)O}_{10}$  polyhedra. (b) the unit cell of FBBs viewed along the *c*-axis. (c) the whole structure viewed along *c*-axis. K—O and Rb—O bonds are omitted for clarity.

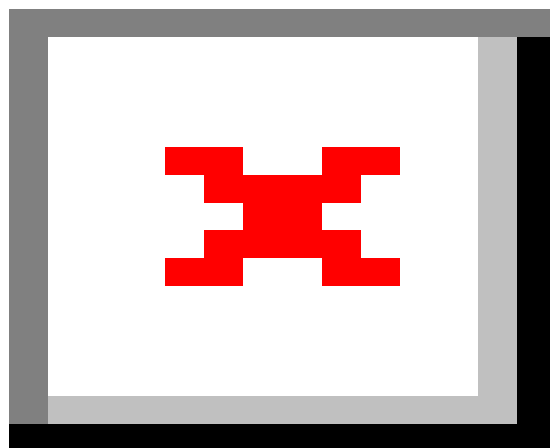

**Fig. S2** K/Rb—O layers of **I** (a) and **II** (b), respectively.

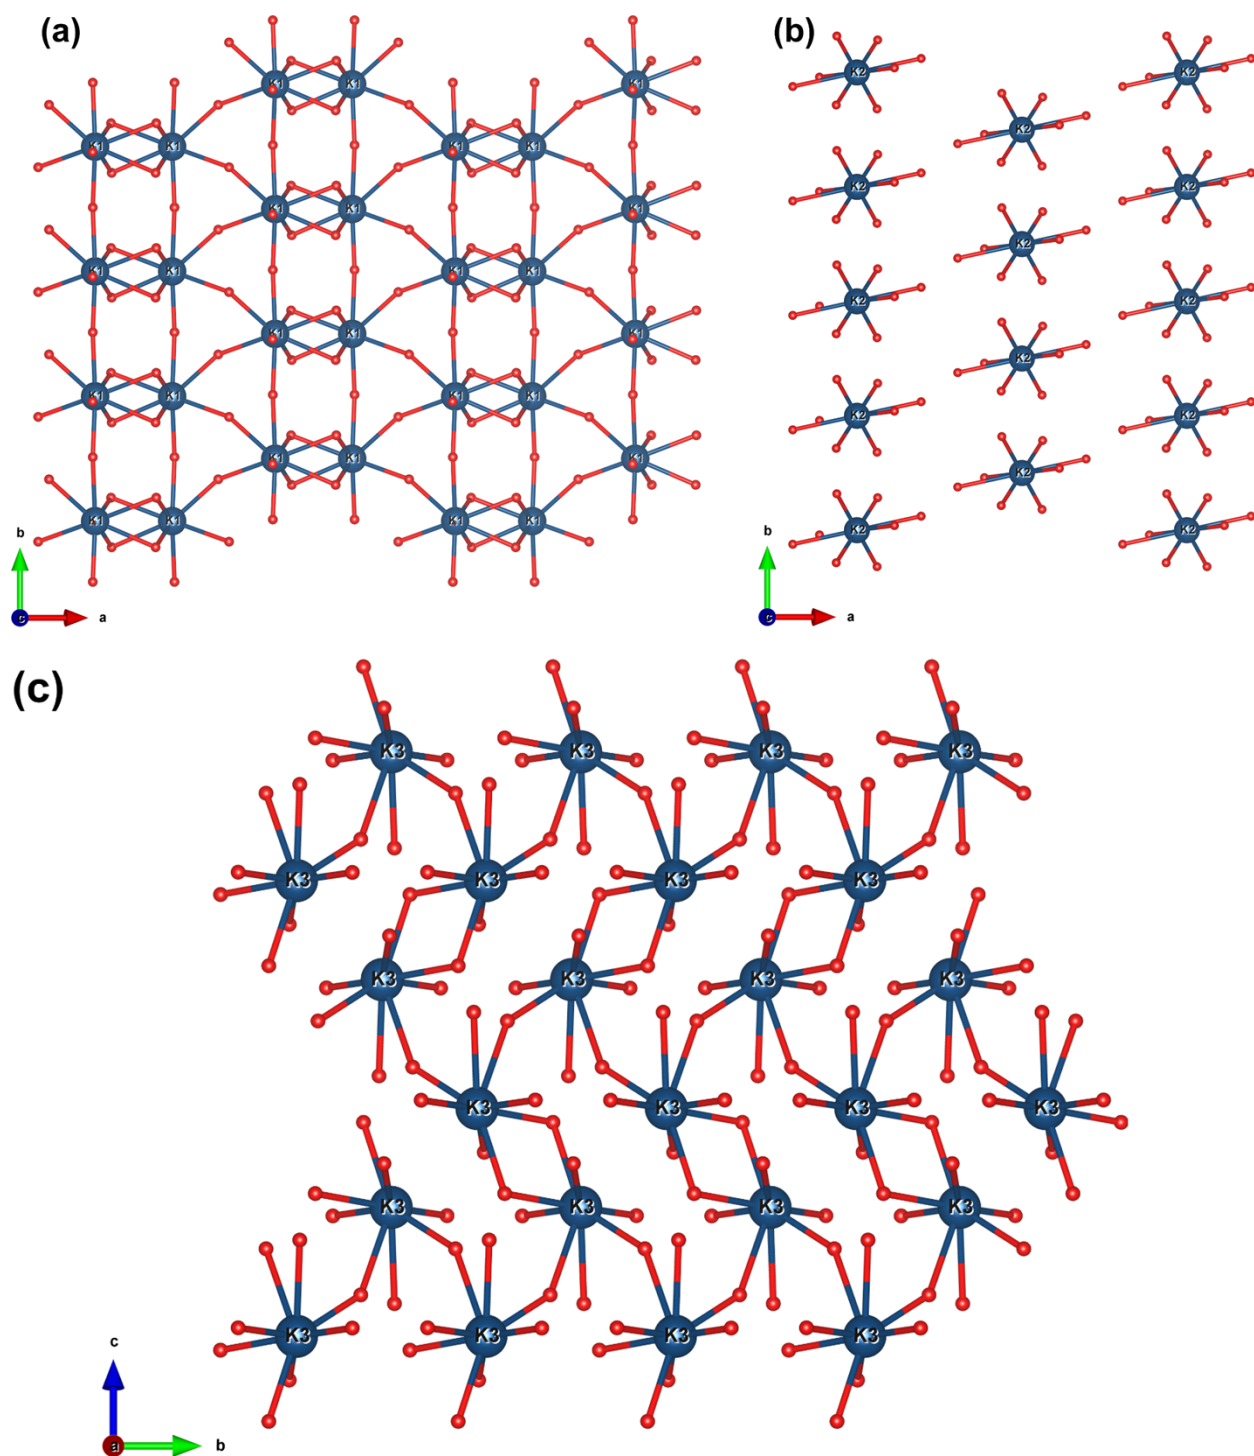

**Fig. S3** Coordination environment of K–O atoms in **III**. (a) 2D layer of K(1)O<sub>9</sub> unit along c-axis, (b) isolated K(2)O<sub>8</sub> units along c-axis, and (c) 2D layer of K(3)O<sub>8</sub> units along a-axis.

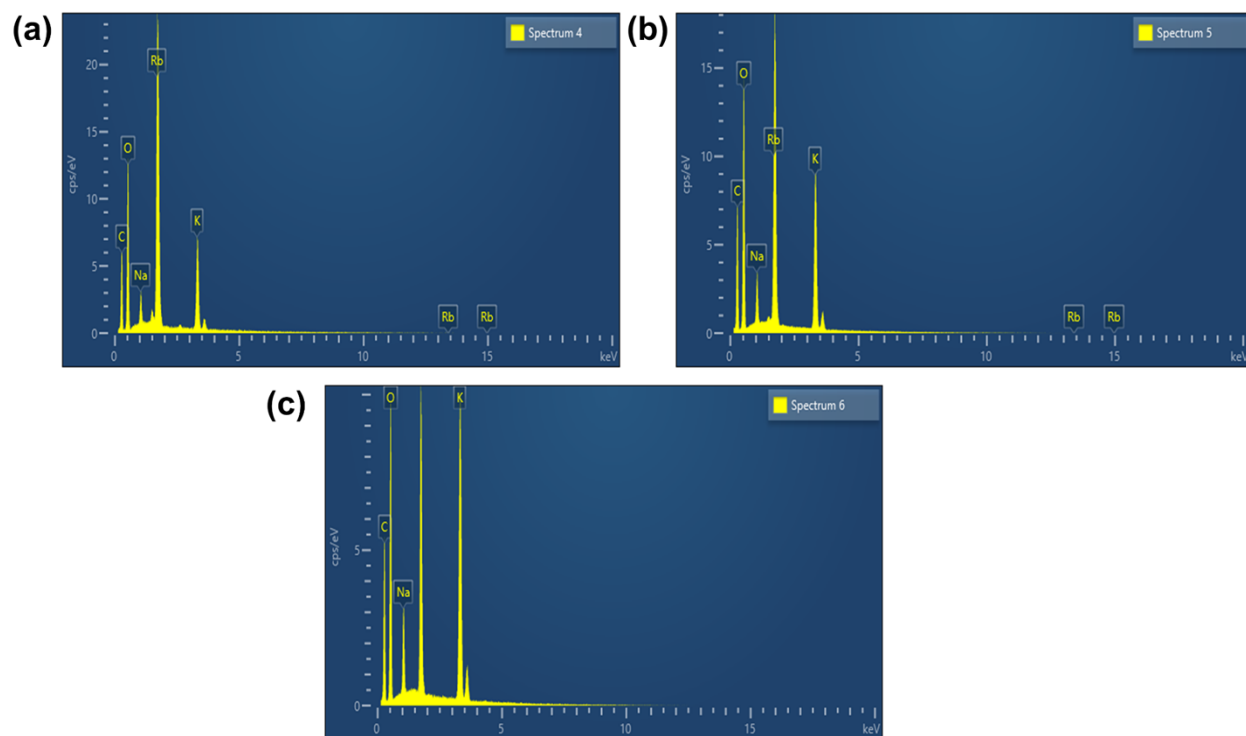

**Fig. S4** EDS for (a) **I**, (b) **II**, and (c) **III**, respectively.

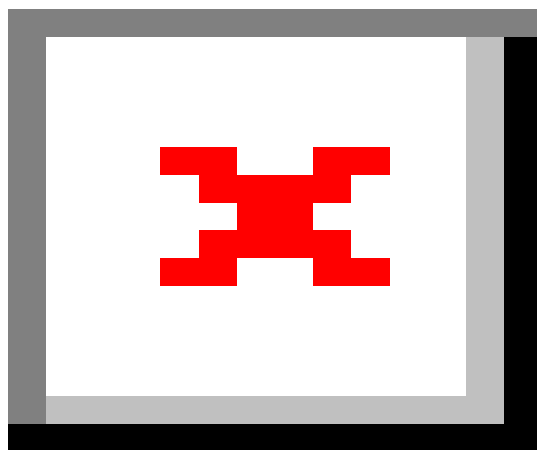

**Fig. S5** Birefringence measurement of **I**, **II**, and **III** using a polarizing microscope. (a, d, g) visual of the crystals reaching extinction with the compensator's negative rotation for **I**, **II**, and **III**, respectively. (b, e, h) visual of the crystals reaching extinction with the compensator's positive rotation for **I**, **II**, and **III**, respectively. (c, f, i) thickness of the crystals for measurement.

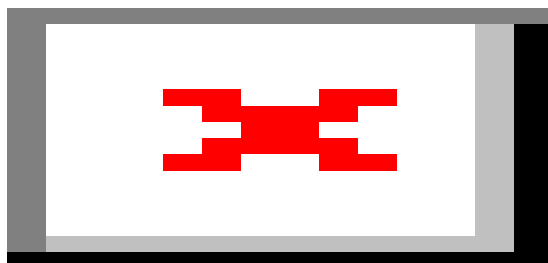

**Fig. S6** Oscilloscope traces of the SHG signals for the powder of (a) **I** and **KDP** (88–105  $\mu\text{m}$  particle size range) and (b) **II** and **KDP** (55–88  $\mu\text{m}$  particle size range).

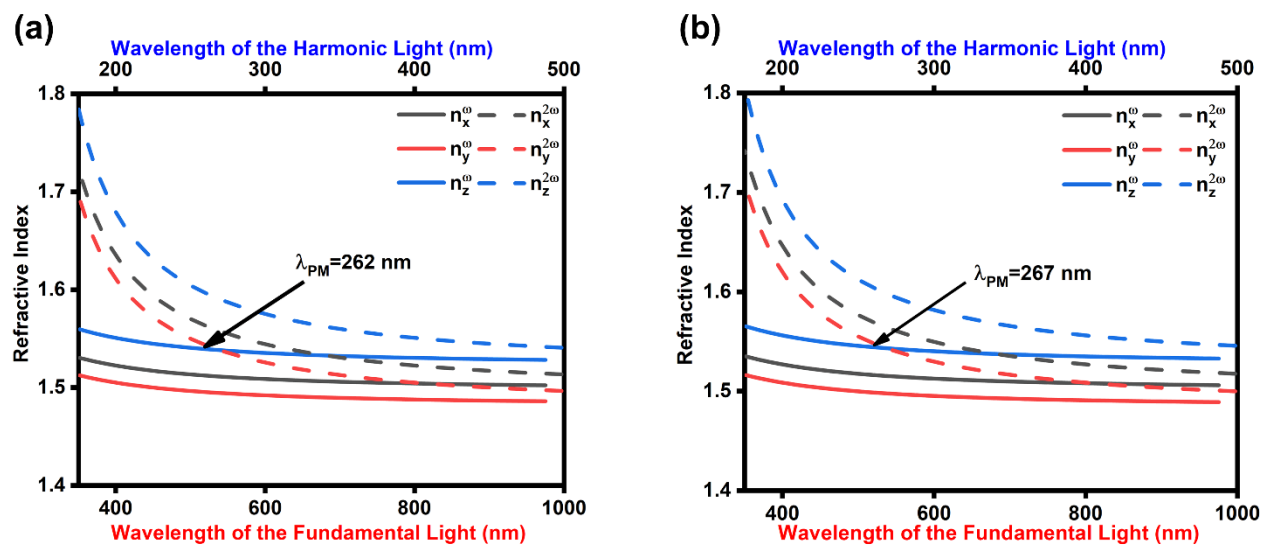

Fig. S7 The calculated phase matching wavelength ( $\lambda_{PM}$ ) for I (a) and II (b), respectively.

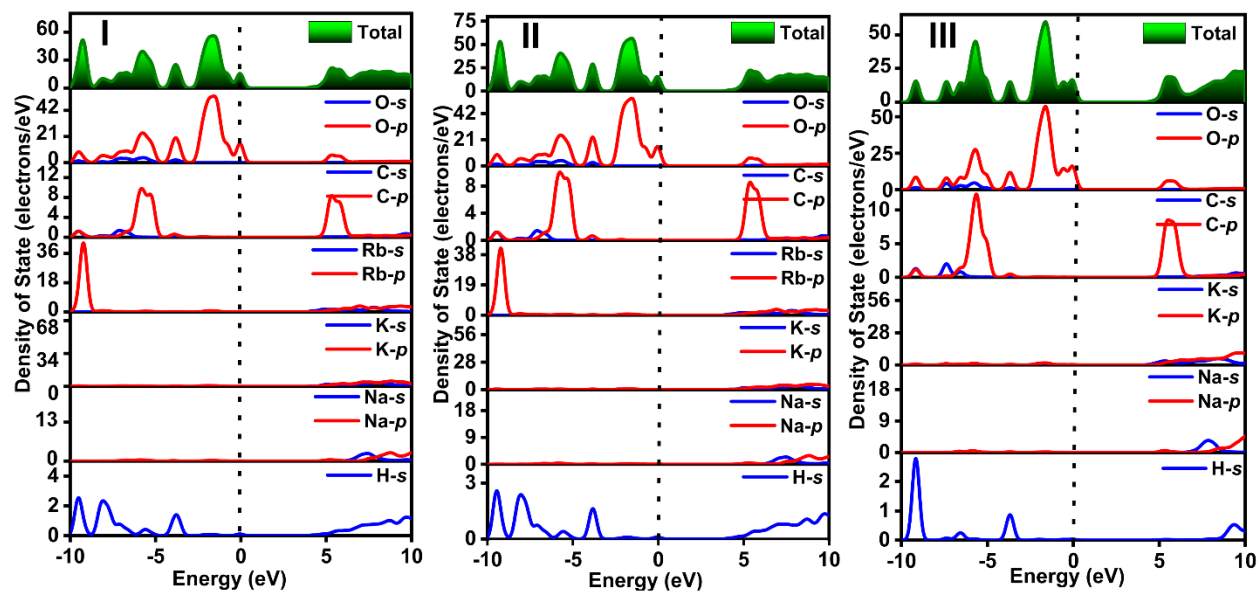

**Fig. S8** Total and partial density of states (DOS) of **I**, **II**, and **III**.

## References

1. O. V. Dolomanov, L. J. Bourhis, R. J. Gildea, J. A. K. Howard and H. Puschmann, *J. Appl. Crystallogr.*, 2009, **42**, 339–341.
2. G. M. Sheldrick, *Acta Crystallogr. A*, 2008, **64**, 112–122.
3. A. L. Spek, *J. Appl. Crystallogr.*, 2003, **36**, 7–13.
4. S. K. Kurtz and T. T. Perry, *J. Appl. Phys.*, 1968, **39**, 3798–3813.
5. S. J. Clark, M. D. Segall, C. J. Pickard, P. J. Hasnip, M. I. J. Probert, K. Refson and M. C. Payne, *Z. Kristallogr. Cryst. Mater.*, 2005, **220**, 567–570.
6. T. L. Gilbert, *Phys. Rev. B*, 1975, **12**, 2111–2120.
7. J. P. Perdew, K. Burke and M. Ernzerhof, *Phys. Rev. Lett.*, 1996, **77**, 3865–3868.
8. H. J. Monkhorst and J. D. Pack, *Phys. Rev. B*, 1976, **13**, 5188–5192.
9. J. S. Lin, A. Qteish, M. C. Payne and V. Heine, *Phys. Rev. B*, 1993, **47**, 4174–4180.
10. A. M. Rappe, K. M. Rabe, E. Kaxiras and J. D. Joannopoulos, *Phys. Rev. B*, 1990, **41**, 1227–1230.
